# Supplementary material
Source: publisher figshare collection journal article supplement (https://acs.figshare.com/ndownloader/files/4204375)
Supplement: Supplementary file 1 [file 4204375]

## Supporting information

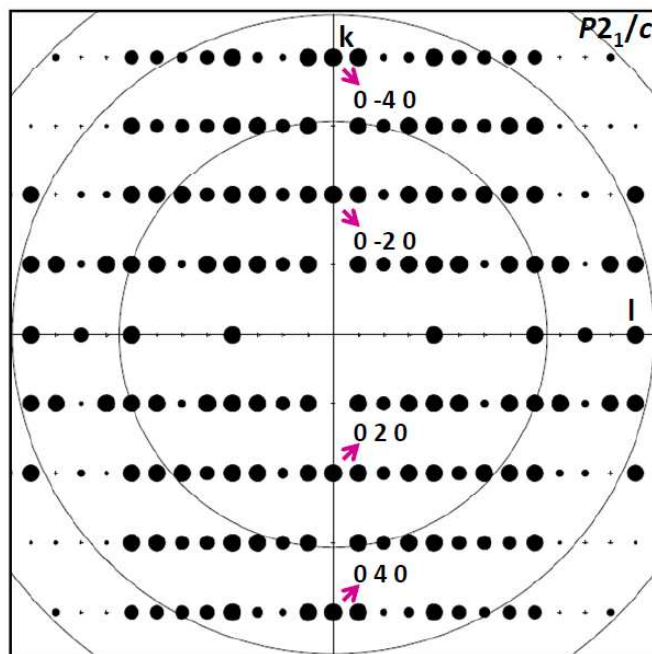

Figure S1 shows the  $hkl$  plot for  $P2_1/c$ . Please observe that only  $k=2n$  reflections in  $0k0$  are present.

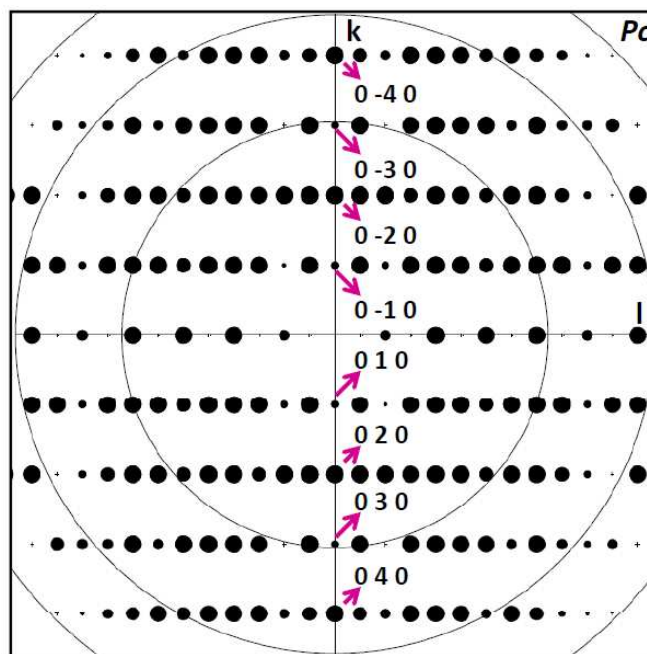

Figure S2 shows the  $hkl$  plot for  $Pc$ . Here we observe that both  $k=2n$  and  $k=2n+1$  reflections in  $0k0$  are present.
